# Supplementary material for: X-Ray Structure of the Human Calreticulin Globular Domain Reveals a Peptide-Binding Area and Suggests a Multi-Molecular Mechanism
Source: PubMed Central journal article supplement (PMC3057994; doi:10.1371/journal.pone.0017886), 2011-03-15
Supplement: pone.0017886.s001.pdf [file pone.0017886.s001.pdf]

## Figure S1: Sequence alignments of surface residues of cluster 2.

This sequence alignment shows how the residues displayed in Figure 2B (highlighted in yellow) are strongly conserved in the CRT /CNX sequence family. More detailed information about the sequence names is provided in Figure S2.

|                  |                           |                  |                           |
|------------------|---------------------------|------------------|---------------------------|
| GROUP_1          |                           | GROUP_3          |                           |
| human_GB_CRT     | DEFTHLYTLIVRPDNTYEVKIDNS  | SPT_Q4R3W0_MACFA | DGFTHLYTLILRPDLSYDVKIDGQ  |
| SPT_A8E4J9_9ACAR | DVFTHLYTLIVKPDNTYVVKIDNE  | SPT_B1Q2L7_MOUSE | DGFTHLYTLILRPDLSYEVKVDGQ  |
| SPT_Q64K99_9ACAR | DVFTHLYTLIVKPDNTYVVKIDNE  | SW_CALR3_HUMAN   | DGFTHLYTLILRPDLSYDVKIDGQ  |
| SPT_B5X0V5_SALSA | DELTHLYTLILNPDQTYEVKINNE  | SPT_Q3TQS0_MOUSE | NKDTHLYTLILRPNATYEVKIDNQ  |
| SW_CALR_RABIT    | DEFTHLYTLIVRPDNTYEVKIDNS  | SPT_D3ZYM6_RAT   | NKDTHLYTLILRPNATYEVKIDNE  |
| SPT_Q64K76_IXOPE | DVYTHLYTLIVKPDNTYTVKIDNE  | SPT_C1N041_9CHLO | DELTHVYTLRLHANNTYEVVIDNE  |
| SPT_Q7ZXY3_XENLA | DSFTHLYTLIVRPDNTYEVKIDNS  | SPT_O45034_SCHJA | DQKTHLYTLIVRPDNSYEVVLDNE  |
| SPT_Q68HD1_IXOSC | DVYTHLYTLIVKPDNTYTVKIDNE  | SPT_C4Q5I7_SCHMA | DLKTHLYTLIVNPNNKYEVVLDNE  |
| SPT_B5X207_SALSA | DEYTHLYTLILNPDNTYEVKIDNK  | SPT_C8XTL8_9EUKA | DQLTHVYTLVVKPDNTYKIKIDGE  |
| SPT_Q64K83_9ACAR | DVYTHLYTLVLKPDNTYTVKIDNE  | SPT_D3BIF1_POLPA | DQLSHQYTLILKPDNTYAVLIDNV  |
| SW_CALR_MACFA    | DEFTHLYTLIVRPDNTYEVKIDNS  | SW_CALR_EUGGR    | DTLSHTYTAVIKADRTEYEVVLDQV |
| SPT_Q9U6S0_STRPU | DEFTHLYTLIVKSDNSYEVVIDNE  | SPT_C4M296_ENTHI | DDISHLYTLIIRPNNTYVVKIDGV  |
| SPT_A5D7J6_BOVIN | DEFTHLYTLIVRPNNTYEVKIDNS  | SPT_B7GDH4_PHATR | DSVTHLYTLVVRPDNTFEVFDNK   |
| SPT_A1YB06_EISFO | DTLSHLYTLIVRPDNTYEVKIDNK  | SPT_Q967S4_TRYCO | DKLTHAYTLHIAPDNSYKFFLDGS  |
| SPT_Q98984_RANRU | DVYSHLYTLIVRPDNTYEVKIDNS  | SPT_A4HJP8_LEIBR | EKATHVYTVQISPNNTYQLYVDGK  |
| SPT_B3S3X6_TRIAD | DELTHLYTLILKSDNTYEVKIDNE  | SPT_Q4Q601_LEIMA | DTATHVYTVETIAPNNTYQLYVDGM |
| SPT_Q6NVT6_XENTR | DSFTHLYTLIVRPDNTYEVKIDNS  | SPT_Q4CPZ0_TRYCR | DKLTHVYTLHIAADNSYEFFLDGE  |
| SPT_A5LGG9_CRAGI | DVFTHLYTLIVNPDNSYVVKIDNE  | SPT_C8CIJ1_9TRYP | DKLTHVYTLRISSDDSYELYVDDEE |
| SW_CALR_CRIGR    | DEFTHLYTLIVRPDNTYEVKIDNS  | SPT_Q9XYF8_TRYCR | DKLTHVYTLHIAADNSYEFFLDGE  |
| SPT_A6YIE3_PINFU | DVFTHLYTLIVNSDNTYEVVIDNE  | SPT_C5L9W8_9ALVE | DTLSHVYRLVLRPNDTVRVEIDGE  |
| SPT_Q6WSQ2_RHISA | DVFTHLYTLIVKPDNTYQVIKIDNE | SPT_C5LE92_9ALVE | DTSSHVYRLVLRPNDTVRVEVDGE  |
| SPT_Q64K91_DERAN | DVFTHLYPLIVKPDNTYQVKIDNE  | SPT_C5LZP6_9ALVE | DTLSHVYRLVLRPNDTVRVEIDGD  |
| SPT_Q64K92_9ACAR | DVFTHLYTLIVKPDNTYQVKIDNE  | SPT_D0NR25_PHYIN | DTDAHLYSFVLKPDPTYEVKIDGK  |
| SPT_Q0VJ74_9BILA | DELTHLYTLILRPDNTYEVQIDGE  | SPT_A8PEL1_BRUMA | DELSHVYTLILYPNNSIQIFADYE  |
| SPT_Q64K89_DERVA | DVFTHLYTLIVKPDNTYQVKIDNE  |                  |                           |
| SPT_O97372_DIRIM | DVFTHLYTLIVNSDNTYEVQIDGE  | GROUP_4          |                           |
| SPT_Q9PUC1_DANRE | DELTHLYTLILRPDQTYEVKIDNE  | SPT_Q7Y140_ORYSJ | DQLTHVYTLIIRPDAKYSILIDNT  |
| SPT_C5MRN9_9BILA | DELTHLYTLILNADNTYEVQIDGE  | SPT_A9SCB3_PHYPA | DKLSHVYTFIIRPDATYSILVDNK  |
| SPT_Q26268_APLCA | DVFSHLYTLIVRPDNTYEVKIDNE  | SW_CALR_BERST    | DQLTHVYTFILRPDASYSILIDNV  |
| SW_CALR_ONCVO    | DVFTHLYTLIVNSDNTYEVQIDGE  | SPT_C4PB36_CARPA | DQLTHVYTFILRPDATYSILVDNV  |
| SPT_A9C3S5_DANRE | DEYSHLYTLIVNPDNTYEVKIDNK  | SW_CALR1_ARATH   | DQLTHVYTFVLRPDATYSILIDNV  |
| SPT_B8K275_FENCH | DVFSHLYTLIVNPDNTYEVVIDNE  | SPT_A9NS22_PICSI | DQLTHVYTFILHPDATYSILIDNK  |
| SPT_Q8IS63_COTRU | DVYTHLYTLIVKPDNTYEVVIDNE  | SPT_Q5MCL9_WHEAT | DQLSHVYTLIIRPDATYSILIDNE  |
| SPT_Q8WR36_ANOGA | DVFTHFYTLVVRADNTYEVVIDNE  | SPT_O22502_BRANA | DQLTHVYTFILRPDATYTILVDNV  |
| SPT_Q17MI1_AEDAE | DVYTHFYTLVVKSDNTYEVVIDNE  | SPT_B9F6V5_ORYSJ | DQLTHVYTLIIRPDAKYSILIDNT  |
| SPT_C1BVC1_9MAXI | DAFTHLYTLILNTDRTYQVLIDNA  |                  |                           |
| SPT_D3TM69_GLOMM | DVYTHFYTLIVKPDNTYEVVIDNE  | GROUP_5          |                           |
|                  |                           | SPT_B5M4U3_9STRA | DKDTHLYTAVIRDDNTFEVFDQK   |
| GROUP_2          |                           | SPT_A9PHA6_POPTR | DKHTHVYTAILKSDNELQILVDGE  |
| SPT_C6TCW1_SOYBN | DRLTHFYTFILRPDATYSVLVDNR  | SW_CALX_PEA      | DKLSHVYTAVLKDDNEVSILIDGE  |
| SPT_B6TA28_MAIZE | DKLTHVYTFILRPDASYSLLVDNR  | SW_CALX_RAT      | DKKTHLYTLILNPDNSFEILVDQS  |
| SPT_C5XET1_SORBI | DKLTHFYTFILRPDASYSLLVDNR  | SPT_B4R3M8_DROSI | DYLPHLYQLVVRPDNSFEIRVDHK  |
| SPT_B8LRK0_PICSI | DKLTHVYTLIIRPDASYSILIDNR  | SPT_Q9TVF3_SCHJA | DKKTHLYTLVLRSDNSFERVIDQI  |
| SPT_B4FUA8_MAIZE | DKLTHVYTFILRPDASYSLLVDNR  | SPT_A2E253_TRIVA | DKNNHLYTLIVRPDNTFEILIDAE  |
| SPT_C5Z0S1_SORBI | DKLTHFYTFILRPDATYSILIDNR  | SPT_A8K454_HUMAN | DRKTHLYTLVMNPDDTFEVLVDQT  |
| SPT_Q8GUI1_ARATH | DKLNHFYTFILRPDASYSVLVDNK  | SPT_Q80YU3_MOUSE | DRKTHLYTLVMNPDDTFEVLIDQK  |
| SPT_B9MY68_POPTR | DKLTHFYTFILRPDASYSVLVDNR  | SPT_Q7Q9V3_ANOGA | DKRPHLYQLIIRPDNTYTIRVDHK  |
| SPT_Q8LJ85_ORYSJ | DKLTHVYTFILRPDASYSILVDNR  | SPT_B4JYJ8_DROGR | DKLPHLYQLVLRPDNSFEIRLDHK  |
| SPT_B8AZS4_ORYSI | DKLTHFYTFILRPDASYSLLVDNR  | SPT_D1ZZU8_TRICA | DKLPHLFTLVLRHPDNTFEILIDNK |
|                  |                           | SPT_Q0KHZ9_DROME | DKLPHLYQLVVRPDNSFEIRVDHK  |
|                  |                           | SPT_Q9I7S9_DROME | DKLPHLYQLVVRPDNSFEIRIDHK  |
|                  |                           | SPT_B4IF87_DROSE | DKLPHLYQLVVRPDNSFEIRIDHK  |
|                  |                           | SPT_Q6ZP56_HUMAN | DKKTHLYTLILNPDNSFEILVDQS  |
