# Supplementary material for: X-Ray Structure of the Human Calreticulin Globular Domain Reveals a Peptide-Binding Area and Suggests a Multi-Molecular Mechanism
Source: PubMed Central journal article supplement (PMC3057994; doi:10.1371/journal.pone.0017886), 2011-03-15
Supplement: pone.0017886.s002.pdf [file pone.0017886.s002.pdf]

## Figure S2: Description of the set of sequences of the CRT/CNX family.

The following information about the sequence names is indicated: main protein name (when defined), source and alignment score of the whole sequence to the human globular domain sequence. The sequences have been automatically assigned to several groups using the pipealign procedure. In the alignments, the sequence names directly coming from the Swissprot database have the SW prefix; the other protein sequences, translated from the gene, have the SPT prefix.

| GROUP_1      |                    |                                                                 |                         |
|--------------|--------------------|-----------------------------------------------------------------|-------------------------|
| Sequence ID  | Protein Name       | Source                                                          | Alignment Score         |
| human_GB_CRT | Calreticulin       | Human                                                           | user submitted sequence |
| A8E4J9_9ACAR | Calreticulin       | Haemaphysalis qinghaiensis.                                     | 2e-84                   |
| Q64K99_9ACAR | Calreticulin       | Amblyomma cooperi.                                              | 1e-83                   |
| B5X0V5_SALSA | Calreticulin       | Salmo salar (Atlantic salmon).                                  | 7e-82                   |
| CALR_RABIT   | Calreticulin       | Oryctolagus cuniculus (Rabbit).                                 | e-102                   |
| Q64K76_IXOPE | Calreticulin       | Ixodes persulcatus (Taiga tick).                                | 7e-81                   |
| Q7ZXY3_XENLA | Crc protein        | Xenopus laevis (African clawed frog)                            | 2e-92                   |
| Q68HD1_IXOSC | Calreticulin       | Ixodes scapularis (Black-legged tick) (Deer tick).              | 4e-80                   |
| B5X207_SALSA | Calreticulin       | Salmo salar (Atlantic salmon).                                  | 2e-87                   |
| Q64K83_9ACAR | Calreticulin       | Ixodes minor.                                                   | 7e-80                   |
| CALR_MACFA   | Calreticulin       | Macaca fascicularis (Crab eating macaque) (Cynomolgus monkey).  | e-107                   |
| Q9U6S0_STRPU | Calreticulin       | Strongylocentrotus purpuratus (Purple sea urchin).              | 1e-78                   |
| A5D7J6_BOVIN | CALR protein       | Bos taurus (Bovine).                                            | e-101                   |
| A1YB06_EISFO | Calreticulin       | Eisenia foetida (Common brandling worm) (Common dung-worm).     | 9e-74                   |
| Q98984_RANRU | Calreticulin       | Rana rugosa (Wrinkled frog).                                    | 7e-86                   |
| B3S3X6_TRIAD | Putative           | Trichoplax adhaerens.                                           | 2e-73                   |
| Q6NVT6_XENTR | Calreticulin       | Xenopus tropicalis (Western clawed frog) (Silurana tropicalis). | 9e-90                   |
| A5LGG9_CRAGI | Calreticulin       | Crassostrea gigas (Pacific oyster) (Crassostrea angulata).      | 4e-73                   |
| CALR_CRIGR   | Calreticulin       | Cricetulus griseus (Chinese hamster).                           | e-103                   |
| A6YIE3_PINFU | Calreticulin       | Pinctada fucata (Pearl oyster).                                 | 4e-72                   |
| Q6WSQ2_RHISA | Calreticulin       | Rhipicephalus sanguineus (Brown dog tick).                      | 2e-80                   |
| Q64K91_DERAN | Calreticulin       | Dermacentor andersoni (Rocky mountain wood tick).               | 4e-82                   |
| Q64K92_9ACAR | Calreticulin       | Dermacentor albipictus.                                         | 5e-83                   |
| Q0VJ74_9BILA | Calreticulin       | Heligmosomoides polygyrus.                                      | 3e-70                   |
| Q64K89_DERVA | Calreticulin       | Dermacentor variabilis (American dog tick).                     | 2e-82                   |
| O97372_DIRIM | Calreticulin       | Dirofilaria immitis (Canine heartworm).                         | 2e-69                   |
| Q9PUC1_DANRE | Calreticulin       | Danio rerio (Zebrafish) (Brachydanio rerio).                    | 6e-85                   |
| C5MRN9_9BILA | Calreticulin-like  | Steinernema feltiae.                                            | 3e-68                   |
| Q26268_APLCA | Calreticulin       | Aplysia californica (California sea hare).                      | 3e-86                   |
| CALR_ONCVO   | Calreticulin       | Onchocerca volvulus.                                            | 7e-69                   |
| A9C3S5_DANRE | Calreticulin, like | Danio rerio (Zebrafish) (Brachydanio rerio).                    | 7e-89                   |
| B8K275_FENCH | Calreticulin       | Fenneropenaeus chinensis (Fleshy prawn) (Penaeus chinensis).    | 7e-73                   |
| Q8IS63_COTRU | Calreticulin       | Cotesia rubecula (Cabbage white butterfly parasite).            | 2e-71                   |
| Q8WR36_ANOGA | Calreticulin       | Anopheles gambiae (African malaria mosquito).                   | 4e-75                   |
| Q17MI1_AEDAE | Calreticulin       | Aedes aegypti (Yellowfever mosquito) (Culex aegypti).           | 1e-74                   |
| C1BVC1_9MAXI | Calreticulin       | Lepeophtheirus salmonis (salmon louse).                         | 9e-68                   |
| D3TM69_GLOMM | Calreticulin       | Glossina morsitans morsitans (Savannah tsetse fly).             | 2e-74                   |
| GROUP_2      |                    |                                                                 |                         |
| Q7Y140_ORYSJ | Os03g0832200       | Oryza sativa subsp.japonica (Rice).                             | 1e-53                   |
| A9SCB3_PHYPA | Predicted          | Physcomitrella patens subsp.patens.                             | 2e-53                   |
| CALR_BERST   | Calreticulin       | Berberis stolonifera (Barberry).                                | 2e-51                   |
| C4PB36_CARPA | Calreticulin       | Carica papaya (Papaya).                                         | 1e-50                   |
| CALR1_ARATH  | Calreticulin-1     | Arabidopsis thaliana (Mouse-ear cress).                         | 3e-52                   |
| A9NS22_PICSI | Putative           | Picea sitchensis (Sitka spruce).                                | 5e-51                   |
| Q5MCL9_WHEAT | Calreticulin-like  | Triticum aestivum (Wheat).                                      | 2e-54                   |
| O22502_BRANA | Calreticulin       | Brassica napus (Rape).                                          | 2e-35                   |
| B9F6V5_ORYSJ | Putative           | Oryza sativa subsp.japonica (Rice).                             | 3e-43                   |

## Figure Supp 2 (second part)

|              |                   |                                                                |       |
|--------------|-------------------|----------------------------------------------------------------|-------|
| GROUP_3      |                   |                                                                |       |
| Q4R3W0_MACFA | CALR3             | Macaca fascicularis (Crab eating macaque) (Cynomolgus monkey). | 2e-64 |
| B1Q2L7_MOUSE | Calspeculin       | Mus musculus (Mouse).                                          | 5e-66 |
| CALR3_HUMAN  | Calreticulin-3    | Homo sapiens (Human).                                          | 6e-65 |
| Q3TQ50_MOUSE | Calreticulin 4;   | Mus musculus (Mouse).                                          | 2e-66 |
| D3ZYM6_RAT   | Calr4             | Rattus norvegicus (Rat).                                       | 2e-65 |
| C1N041_9CHLO | Predicted         | Micromonas pusilla CCMP1545.                                   | 7e-53 |
| O45034_SCHJA | Putative          | Schistosoma japonicum (Blood fluke).                           | 2e-50 |
| C4Q5I7_SCHMA | Putative          | Schistosoma mansoni (Blood fluke).                             | 6e-52 |
| C8XTL8_9EUKA | Calreticulin      | Lotharella amoebiformis.                                       | 4e-53 |
| D3BIF1_POLPA | Calreticulin      | Polysphondylium pallidum PN500.                                | 6e-60 |
| CALR_EUGGR   | Calreticulin      | Euglena gracilis.                                              | 5e-55 |
| C4M296_ENTHI | Putative          | Entamoeba histolytica.                                         | 9e-46 |
| B7GDH4_PHATR | Calreticulin      | Phaeodactylum tricornutum CCAP 1055/1.                         | 7e-48 |
| Q96754_TRYCO | Calreticulin      | Trypanosoma congolense.                                        | 6e-44 |
| A4HJP8_LEIBR | Calreticulin      | Leishmania braziliensis.                                       | 7e-38 |
| Q4Q601_LEIMA | Putative          | Leishmania major.                                              | 5e-41 |
| Q4CPZ0_TRYCR | Putative          | Trypanosoma cruzi.                                             | 4e-45 |
| C8CIJ1_9TRYP | Calreticulin      | Trypanosoma carassii.                                          | 1e-44 |
| Q9XYF8_TRYCR | Calreticulin      | Trypanosoma cruzi.                                             | 2e-44 |
| C5L9W8_9ALVE | Putative          | Perkinsus marinus ATCC 50983.                                  | 4e-34 |
| C5LE92_9ALVE | Putative          | Perkinsus marinus ATCC 50983.                                  | 1e-32 |
| C5LZP6_9ALVE | Putative          | Perkinsus marinus ATCC 50983.                                  | 8e-34 |
| D0NR25_PHYIN | Calreticulin      | Phytophthora infestans T30-4.                                  | 2e-42 |
| A8PEL1_BRUMA | Calreticulin-like | Brugia malayi (Filarial nematode worm).                        | 4e-29 |
| GROUP_4      |                   |                                                                |       |
| C6TCW1_SOYBN | Putative          | Glycine max (Soybean).                                         | 4e-48 |
| B6TA28_MAIZE | Calreticulin-3    | Zea mays (Maize).                                              | 2e-48 |
| C5XET1_SORBI | Sb03g042500       | Sorghum bicolor (Sorghum) (Sorghum vulgare).                   | 1e-48 |
| B8LRK0_PICSI | Putative          | Picea sitchensis (Sitka spruce).                               | 2e-47 |
| B4FUA8_MAIZE | Putative          | Zea mays (Maize).                                              | 5e-49 |
| C5Z0S1_SORBI | Sb09g024930       | Sorghum bicolor (Sorghum) (Sorghum vulgare).                   | 2e-46 |
| Q8GUI1_ARATH | Calreticulin-like | Arabidopsis thaliana (Mouse-ear cress).                        | 2e-45 |
| B9MY68_POPTR | Predicted         | Populus trichocarpa (Western balsam poplar)                    | 7e-47 |
| Q8LJ85_ORYSJ | Putative          | Oryza sativa subsp.japonica (Rice).                            | 2e-49 |
| B8AZS4_ORYSI | Putative          | Oryza sativa subsp.indica (Rice).                              | 4e-46 |
| GROUP_5      |                   |                                                                |       |
| B5M4U3_9STRA | Calcium-dep-2     | Phytophthora sojae.                                            | 9e-18 |
| A9PHA6_POPTR | Predicted         | Populus trichocarpa (Western balsam poplar)                    | 2e-11 |
| CALX_PEA     | Calnexin-like     | Pisum sativum (Garden pea).                                    | 2e-13 |
| CALX_RAT     | Calnexin          | Rattus norvegicus (Rat).                                       | 8e-21 |
| B4R3M8_DROSI | GD15935           | Drosophila simulans (Fruit fly).                               | 2e-14 |
| Q9TVF3_SCHJA | Sj66              | Schistosoma japonicum (Blood fluke).                           | 5e-18 |
| A2E253_TRIVA | Calreticulin-like | Trichomonas vaginalis.                                         | 3e-23 |
| A8K454_HUMAN | Calmegin-like     | Homo sapiens (Human).                                          | 2e-18 |
| Q80YU3_MOUSE | Calmegin          | Mus musculus (Mouse).                                          | 4e-20 |
| Q7Q9V3_ANOGA | AGAP005032-PB     | Anopheles gambiae (African malaria mosquito).                  | 2e-17 |
| B4JYJ8_DROGR | GH14000           | Drosophila grimshawi (Fruit fly) (Idiomya grimshawi).          | 4e-15 |
| D1ZZU8_TRICA | GLEAN_07397       | Tribolium castaneum (Red flour beetle).                        | 4e-21 |
| Q0KHZ9_DROME | Calnexin 99A,- C  | Drosophila melanogaster (Fruit fly).                           | 7e-15 |
| Q9I7S9_DROME | CG1924            | Drosophila melanogaster (Fruit fly).                           | 3e-12 |
| B4IF87_DROSE | GM13395           | Drosophila sechellia (Fruit fly).                              | 7e-14 |
| Q6ZP56_HUMAN | Calnexin-like     | Homo sapiens (Human).                                          | 9e-19 |
