# Supplementary material for: X-Ray Structure of the Human Calreticulin Globular Domain Reveals a Peptide-Binding Area and Suggests a Multi-Molecular Mechanism
Source: PubMed Central journal article supplement (PMC3057994; doi:10.1371/journal.pone.0017886), 2011-03-15
Supplement: pone.0017886.s004.pdf [file pone.0017886.s004.pdf]

### Figure S4: Sequence alignments of the SQDAR 69-73 segment.

This sequence alignment shows how the residues highlighted in yellow are well conserved in the CRT groups 1 and 2; less conserved in groups 3 and 4; and not conserved in the group 5. The following F74 (green) is found in most of the CRT-like sequences, except for the plant group 4. It is not present in the CNX-like group 5 sequences. Details corresponding to the sequence names are given in Figure S2.

|                  |                 |                  |                 |
|------------------|-----------------|------------------|-----------------|
| GROUP_1          |                 | GROUP_3          |                 |
| human_GB_CRT     | GLQTSQDARFYAL   | SPT_Q4R3W0_MACFA | GLQTTQNGRFYAI   |
| SPT_A8E4J9_9ACAR | GIQTSSEDAFYGL   | SPT_B1Q2L7_MOUSE | GLQTTQNSRFYAI   |
| SPT_Q64K99_9ACAR | GLQTSSEDAFYGI   | SW_CALR3_HUMAN   | GLQTTQNGRFYAI   |
| SPT_B5X0V5_SALSA | GLQTSQDARFYAL   | SPT_Q3TQS0_MOUSE | GLQTTTQDAKFFYAL |
| SW_CALR_RABIT    | GLQTSQDARFYAL   | SPT_D3ZYM6_RAT   | GLQTTTQDAKFFYAL |
| SPT_Q64K76_IXOPE | GIQTSSEDAFYGL   | SPT_C1N041_9CHLO | GIQTSADARFYAL   |
| SPT_Q7ZXY3_XENLA | GLQTSQDARFYAM   | SPT_O45034_SCHJA | GLKTTQDARFYGI   |
| SPT_Q68HD1_IXOSC | GIQTSSEDAFYGL   | SPT_C4Q5I7_SCHMA | GLKTTQDARFYGI   |
| SPT_B5X207_SALSA | GLQTSQDAHFYSS   | SPT_C8XTL8_9EUKA | GIMTTQDAKFFYAL  |
| SPT_Q64K83_9ACAR | GIQTSSEDAFYGL   | SPT_D3BIF1_POLPA | GIQTSQDARFYAI   |
| SW_CALR_MACFA    | GLQTSQDARFYAL   | SW_CALR_EUGGR    | GIQTSQDAKFFYAI  |
| SPT_Q9U6S0_STRPU | GIQTSQDAKFFYGL  | SPT_C4M296_ENTHI | GLQTSSEDNKFFYIA |
| SPT_A5D7J6_BOVIN | GLQTSQDARFYAL   | SPT_B7GDH4_PHATR | GIQTSVDARFFGI   |
| SPT_A1YB06_EISFO | GLQTTQDARFYGI   | SPT_Q967S4_TRYCO | GLRLTEDARFYAL   |
| SPT_Q98984_RANRU | GLQTSQDAKFFYAH  | SPT_A4HJP8_LEIBR | GVKLTEDSKFFYAI  |
| SPT_B3S3X6_TRIAD | GIQTSQDARFYAV   | SPT_Q4Q601_LEIMA | GLKLMEDAKFFYAV  |
| SPT_Q6NVT6_XENTR | GLQTSQDARFYAL   | SPT_Q4CPZ0_TRYCR | GLRLTEDARFYAL   |
| SPT_A5LGG9_CRAGI | GIQTSQDAKFFYGI  | SPT_C8CIJ1_9TRYP | GLQLTQDARFYAV   |
| SW_CALR_CRIGR    | GLQTSQDARFYAL   | SPT_Q9XYF8_TRYCR | GLRLTEDARFYAL   |
| SPT_A6YIE3_PINFU | GIQTSQDAKFFYGI  | SPT_C5L9W8_9ALVE | GLKTAEDHRYFYAY  |
| SPT_Q6WSQ2_RHISA | GLQTSSEDAFYGI   | SPT_C5LE92_9ALVE | GLKTAEDHRYFYAY  |
| SPT_Q64K91_DERAN | GLQTSSEDAFYGI   | SPT_C5LZP6_9ALVE | GLKTAEDHRYFYAY  |
| SPT_Q64K92_9ACAR | GLQTSSEDAFYGI   | SPT_D0NR25_PHYIN | AIKTSSEDAFYAL   |
| SPT_Q0VJ74_9BILA | GLKTSQDAKFFYSR  | SPT_A8PEL1_BRUMA | GLTTTQDVKNYAI   |
| SPT_Q64K89_DERVA | GLQTSSEDAFYGI   |                  |                 |
| SPT_O97372_DIRIM | GLKTTQDAKFFYSI  | GROUP_4          |                 |
| SPT_Q9PUC1_DANRE | GLQTSQDARFYAL   | SPT_C6TCW1_SOYBN | GIQTSSEDAKHFAI  |
| SPT_C5MRN9_9BILA | GLKTAQDARFYSI   | SPT_B6TA28_MAIZE | GIQTTIDARHFYAI  |
| SPT_Q26268_APLCA | IQTSQDARFYGL    | SPT_C5XET1_SORBI | GIQTTMDARHFYAI  |
| SW_CALR_ONCVO    | GLKTTQDAKFFYSI  | SPT_B8LRK0_PICSI | GIQTYPDARHYAI   |
| SPT_A9C3S5_DANRE | GLQTSQDAHFYAM   | SPT_B4FUA8_MAIZE | GIQTTIDARHFYAI  |
| SPT_B8K275_FENCH | GIQTTQDARFYGL   | SPT_C5Z0S1_SORBI | GIQTTGDAKHFAI   |
| SPT_Q8IS63_COTRU | GIQTTTQDARFYAL  | SPT_Q8GUI1_ARATH | GIQTYNDAKHYAI   |
| SPT_Q8WR36_ANOGA | GLQTSQDARFYAL   | SPT_B9MY68_POPTR | GIQTYNDAKHFYAI  |
| SPT_Q17MI1_AEDAE | GLQTSQDARFYAA   | SPT_Q8LJ85_ORYSJ | GIQTTLDARHFYAI  |
| SPT_C1BVC1_9MAXI | GIQTSQDARFYAL   | SPT_B8AZS4_ORYSI | GIQTTSDAKHFYAI  |
| SPT_D3TM69_GLOMM | GLQTSQDARFYAI   |                  |                 |
|                  |                 | GROUP_5          |                 |
| GROUP_2          |                 | SPT_B5M4U3_9STRA | GLVLDKPARHYGL   |
| SPT_Q7Y140_ORYSJ | GIQTSSEDFYFYAI  | SPT_A9PHA6_POPTR | GLLVSEPAKHYAI   |
| SPT_A9SCB3_PHYPA | GIQTSSTDSRYFYAI | SW_CALX_PEA      | GLLVSEPAKHYAI   |
| SW_CALR_BERST    | GIQTSSEDFYFYAI  | SW_CALX_RAT      | GLVLMSSRAKHHA   |
| SPT_C4PB36_CARPA | GIQTSSEDFYFYAI  | SPT_B4R3M8_DROSI | GLVLLKSKAKHAAI  |
| SW_CALR1_ARATH   | GIQTSSEDFYFYAI  | SPT_Q9TVF3_SCHJA | ALVLLKSKAKHHAV  |
| SPT_A9NS22_PICSI | GIQTHPDARFFAI   | SPT_A2E253_TRIVA | LFKMKAAASKYYGA  |
| SPT_Q5MCL9_WHEAT | GIQTSSEDFYFYAI  | SPT_A8K454_HUMAN | GLVLLKSKAKHHA   |
| SPT_Q22502_BRANA | RPARTTDTSTPSQL  | SPT_Q80YU3_MOUSE | GLVLLKSKAKHHA   |
| SPT_B9F6V5_ORYSJ | GIQTSSEDFYFYAI  | SPT_Q7Q9V3_ANOGA | GLVLLKSKAKHAAI  |
|                  |                 | SPT_B4JYJ8_DROGR | GLVLLKSKAKHAAI  |
|                  |                 | SPT_D1ZZU8_TRICA | GLVLLKSKAKHAAI  |
|                  |                 | SPT_Q0KHZ9_DROME | GLVLLKSKAKHAAI  |
|                  |                 | SPT_Q9I7S9_DROME | GLVLLKSKAKHAAI  |
|                  |                 | SPT_B4IF87_DROSE | GLVLLKSKAKHAAI  |
|                  |                 | SPT_Q6ZP56_HUMAN | GLVLMSSRAKHHA   |
